# Supplementary material
Source: PubMed Central journal article supplement (PMC6084842)
Supplement: EHP2590.s001.acco.pdf [file EHP2590.s001.acco.pdf]

**Note to readers with disabilities:** *EHP* strives to ensure that all journal content is accessible to all readers. However, some figures and Supplemental Material published in *EHP* articles may not conform to [508 standards](#) due to the complexity of the information being presented. If you need assistance accessing journal content, please contact [ehp508@niehs.nih.gov](mailto:ehp508@niehs.nih.gov). Our staff will work with you to assess and meet your accessibility needs within 3 working days.

## **Supplemental Material**

### **Evaluation of the Impact of Ambient Temperatures on Occupational Injuries in Spain**

Èrica Martínez-Solanas, María López-Ruiz, Gregory A. Wellenius, Antonio Gasparri, Jordi Sunyer, Fernando G. Benavides, and Xavier Basagaña

#### **Table of Contents**

**Figure S1.** Overall cumulative exposure-response relationships in 50 Spanish provinces.

**Figure S2.** Overall cumulative exposure-response relationships in Spain in two periods: 1994-2000 and 2001-2013.

**Figure S3.** Distribution of average of maximum temperatures in winter (a) and summer (b) by Spanish provinces, 1994-2013.

**Table S1.** Descriptive statistics on daily number of occupational injuries and maximum temperature. Spanish Provinces (1994-2013).

**Table S2.** Daily variation in maximum temperature within four Spanish provinces.

**Table S3.** Sensitivity analyses.

**Table S4.** Percent difference (95% Confidence Intervals) for the relationship between extreme cold - hot ambient temperatures and occupational injuries in Spain (1994-2013).

**Table S5.** Percent difference (95% Confidence Intervals) for the relationship between extreme cold - hot ambient temperatures and occupational injuries in Spain (1994-2013). Economic sectors and sex / age.

**Table S6.** Percent difference (95% Confidence Intervals) for the relationship between extreme cold - hot ambient temperatures and occupational injuries in Spain in two periods: 1994-2000 and 2001-2013.

#### **References**

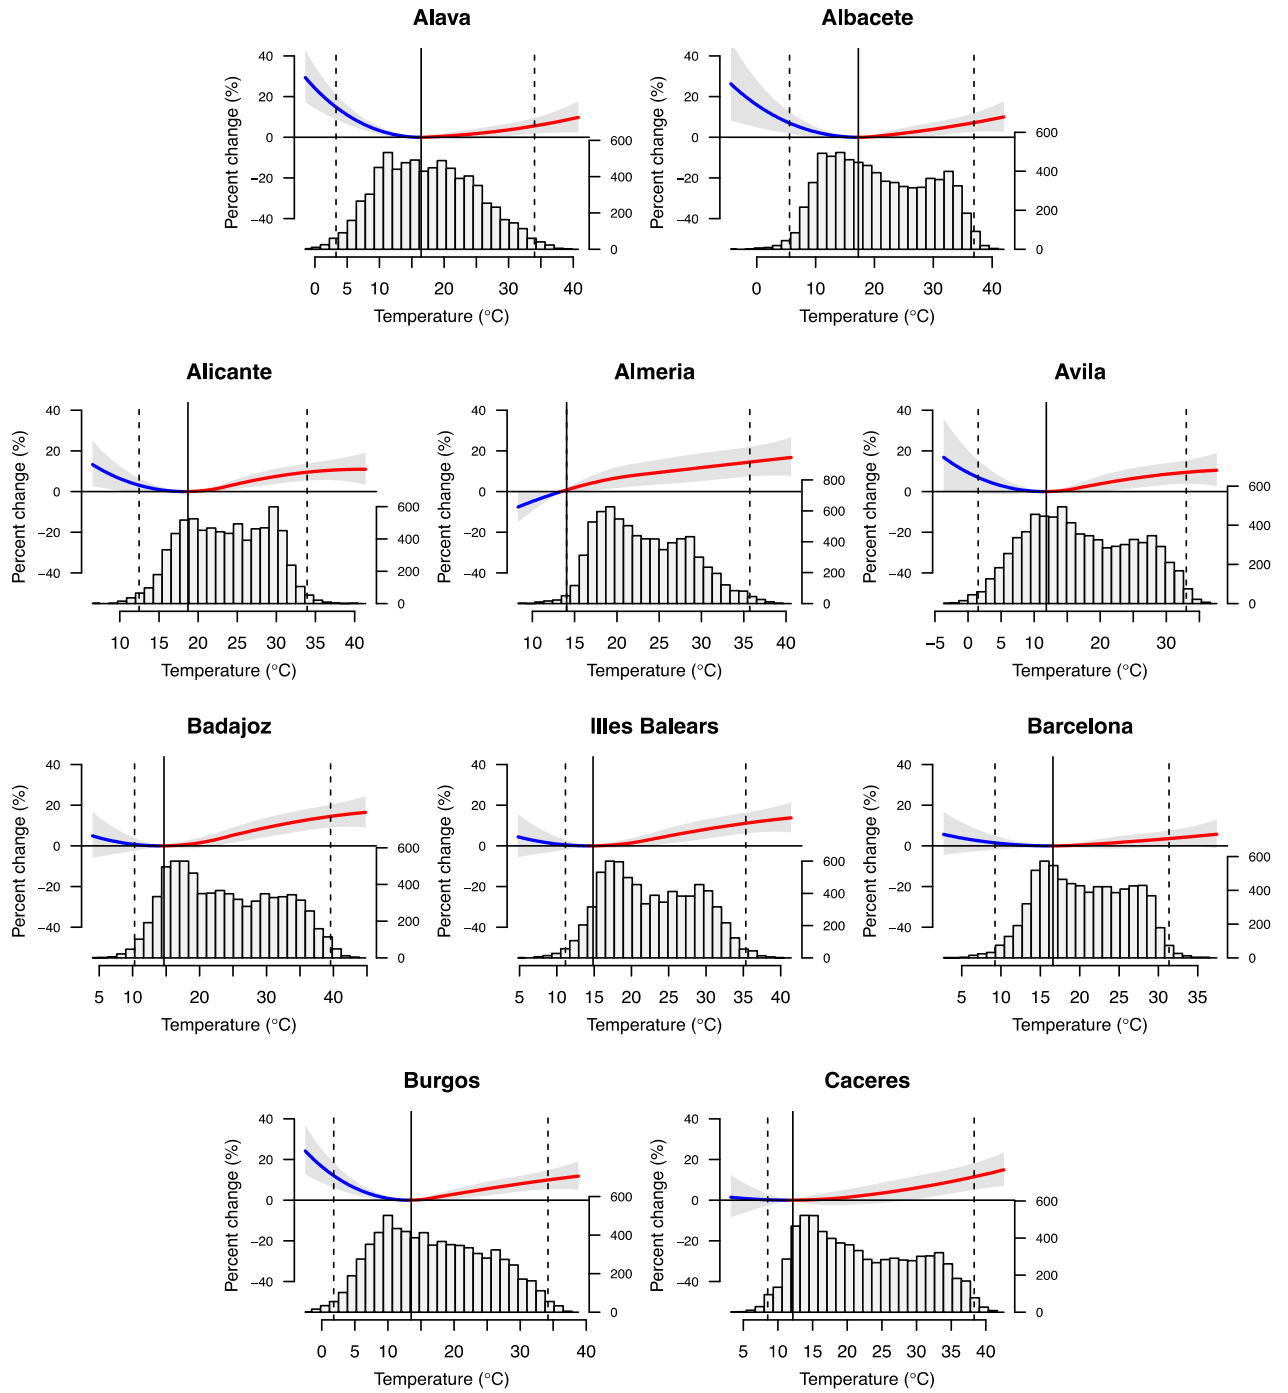

Figure S1 (continues on next page)

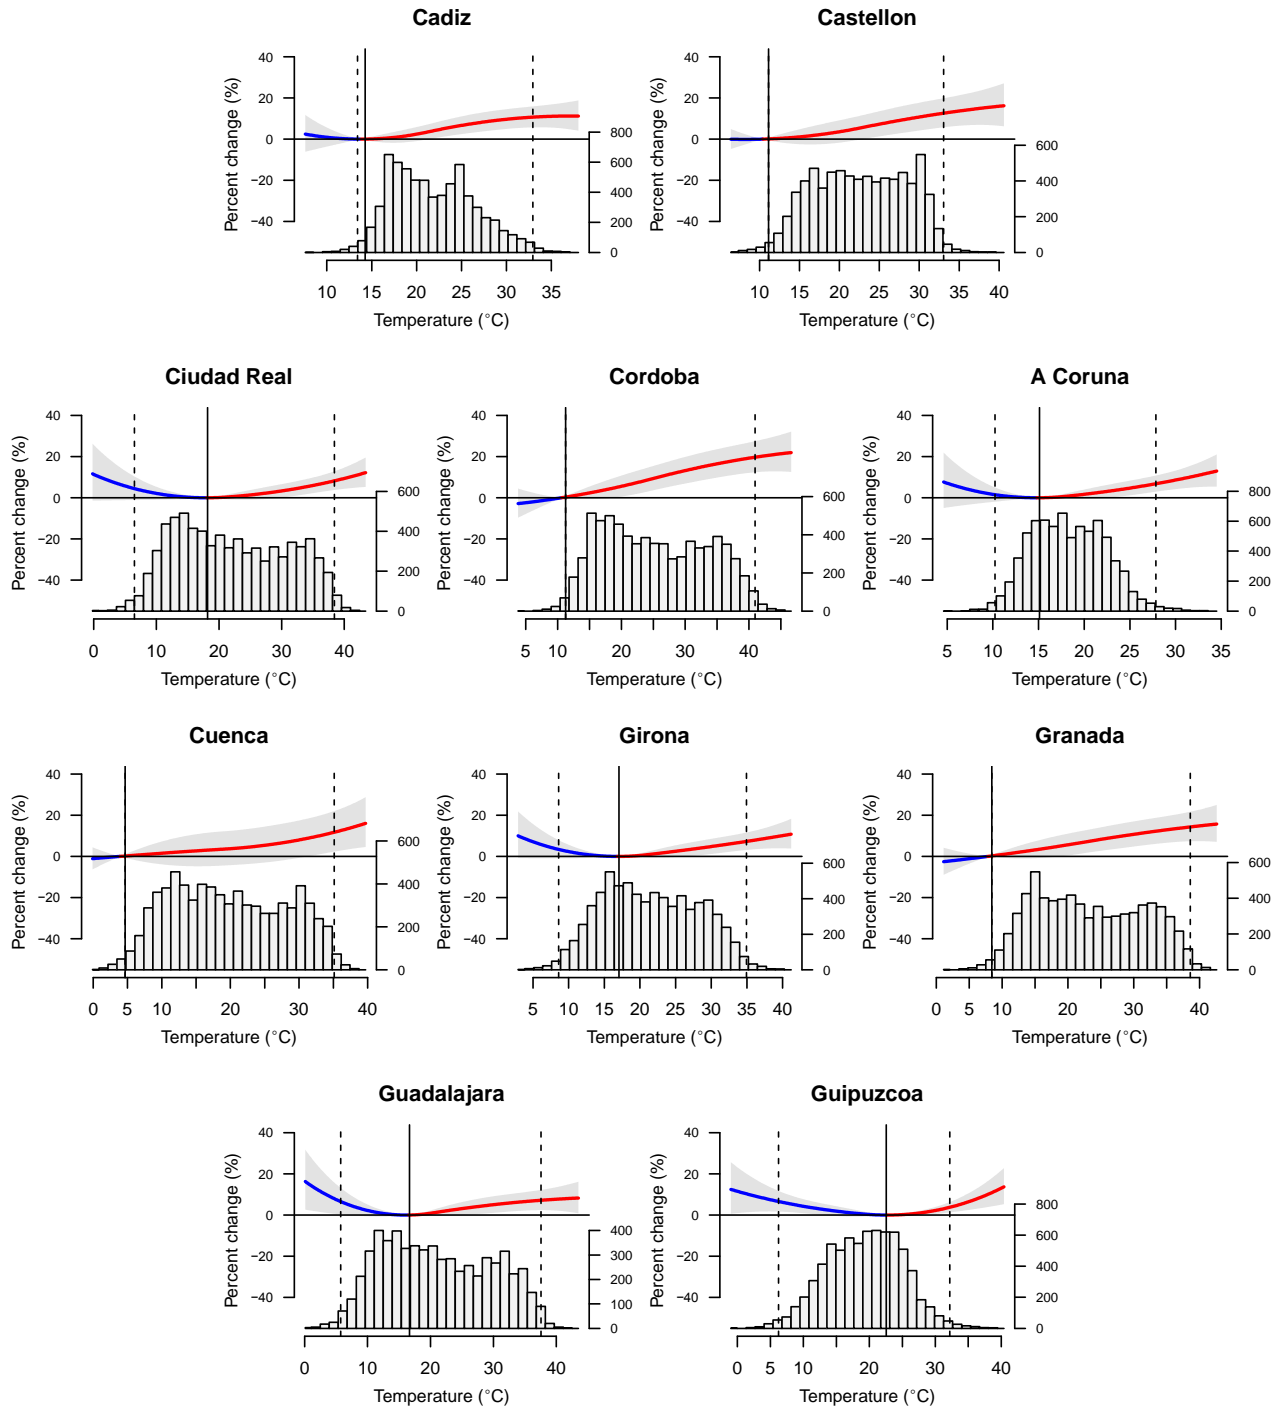

Figure S1 (continues on next page)

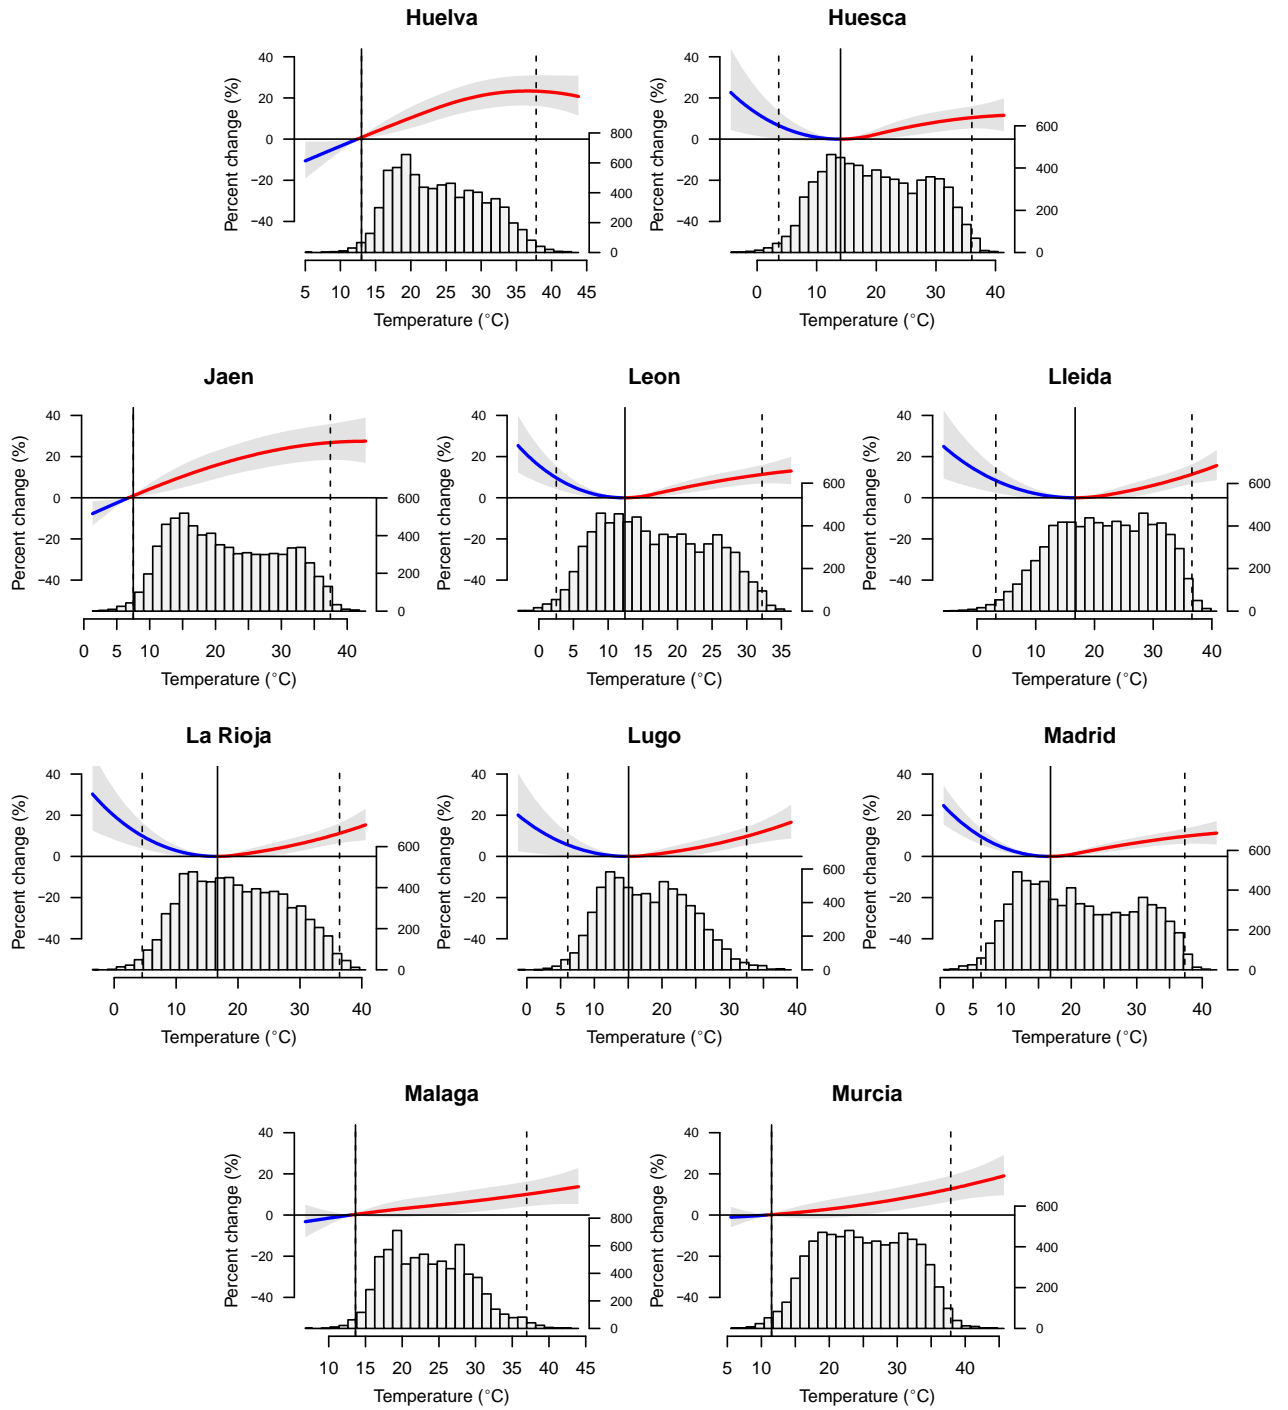

Figure S1 (continues on next page)

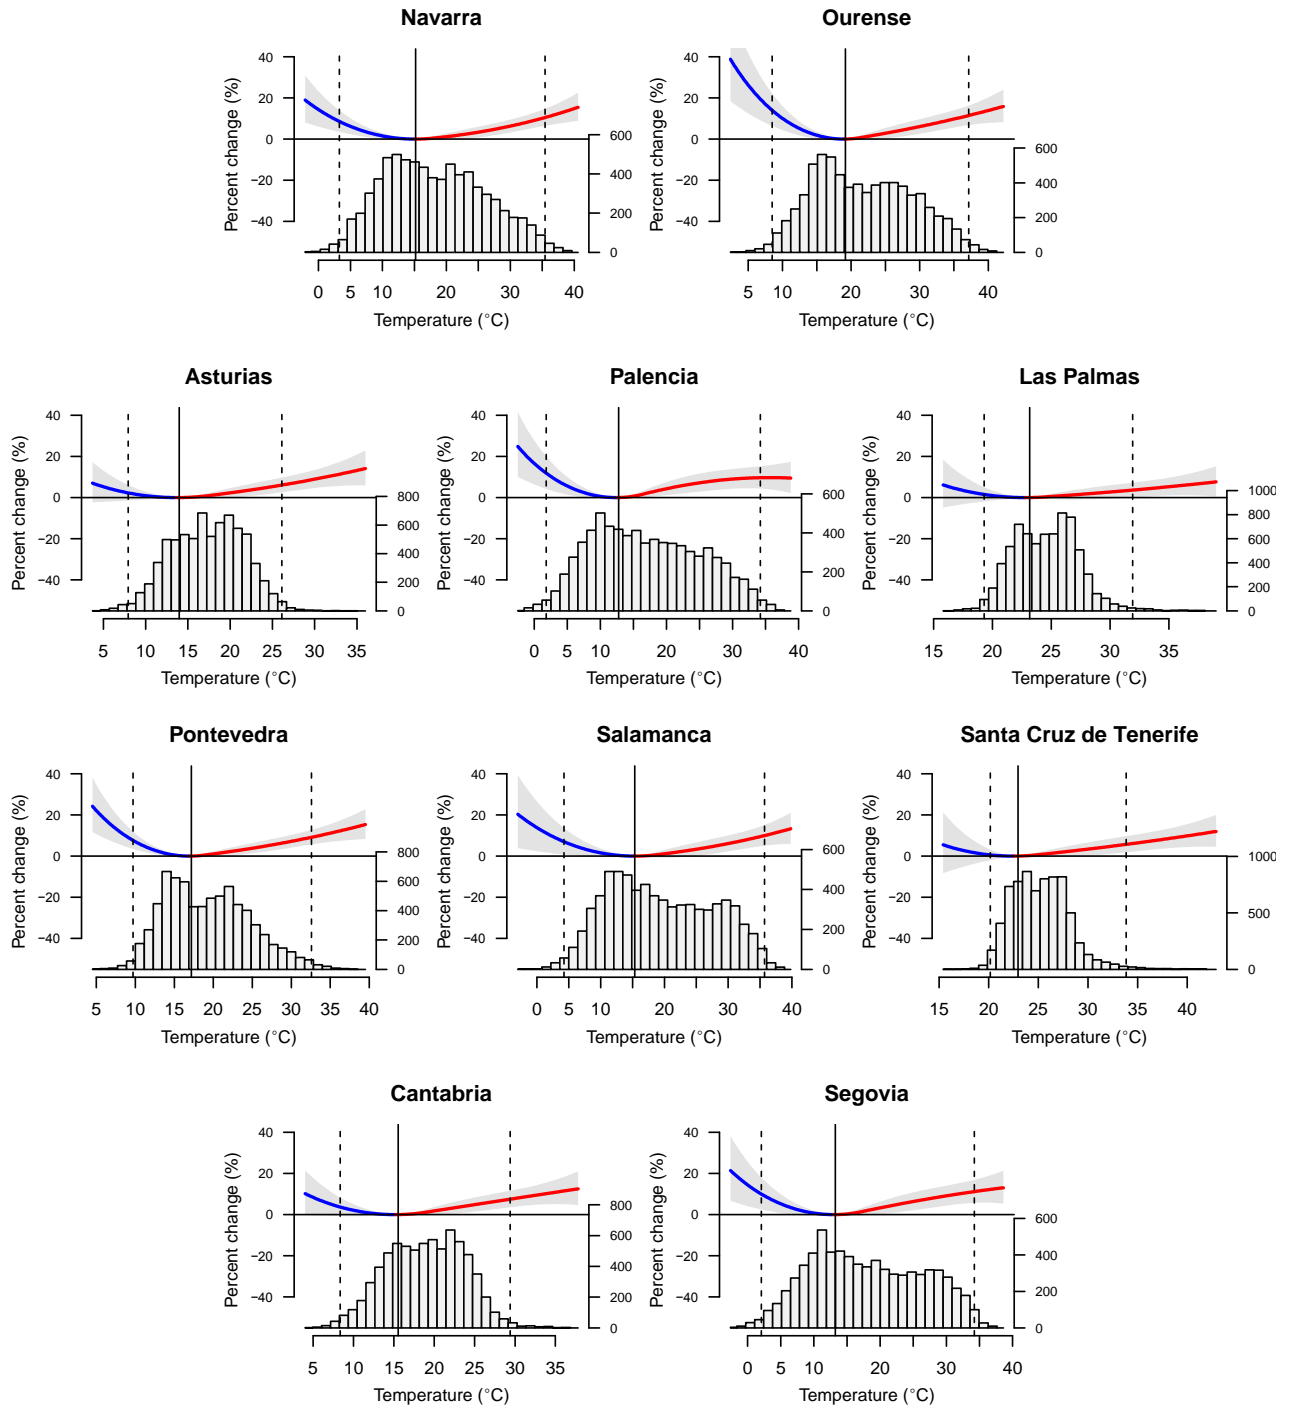

Figure S1 (continues on next page)

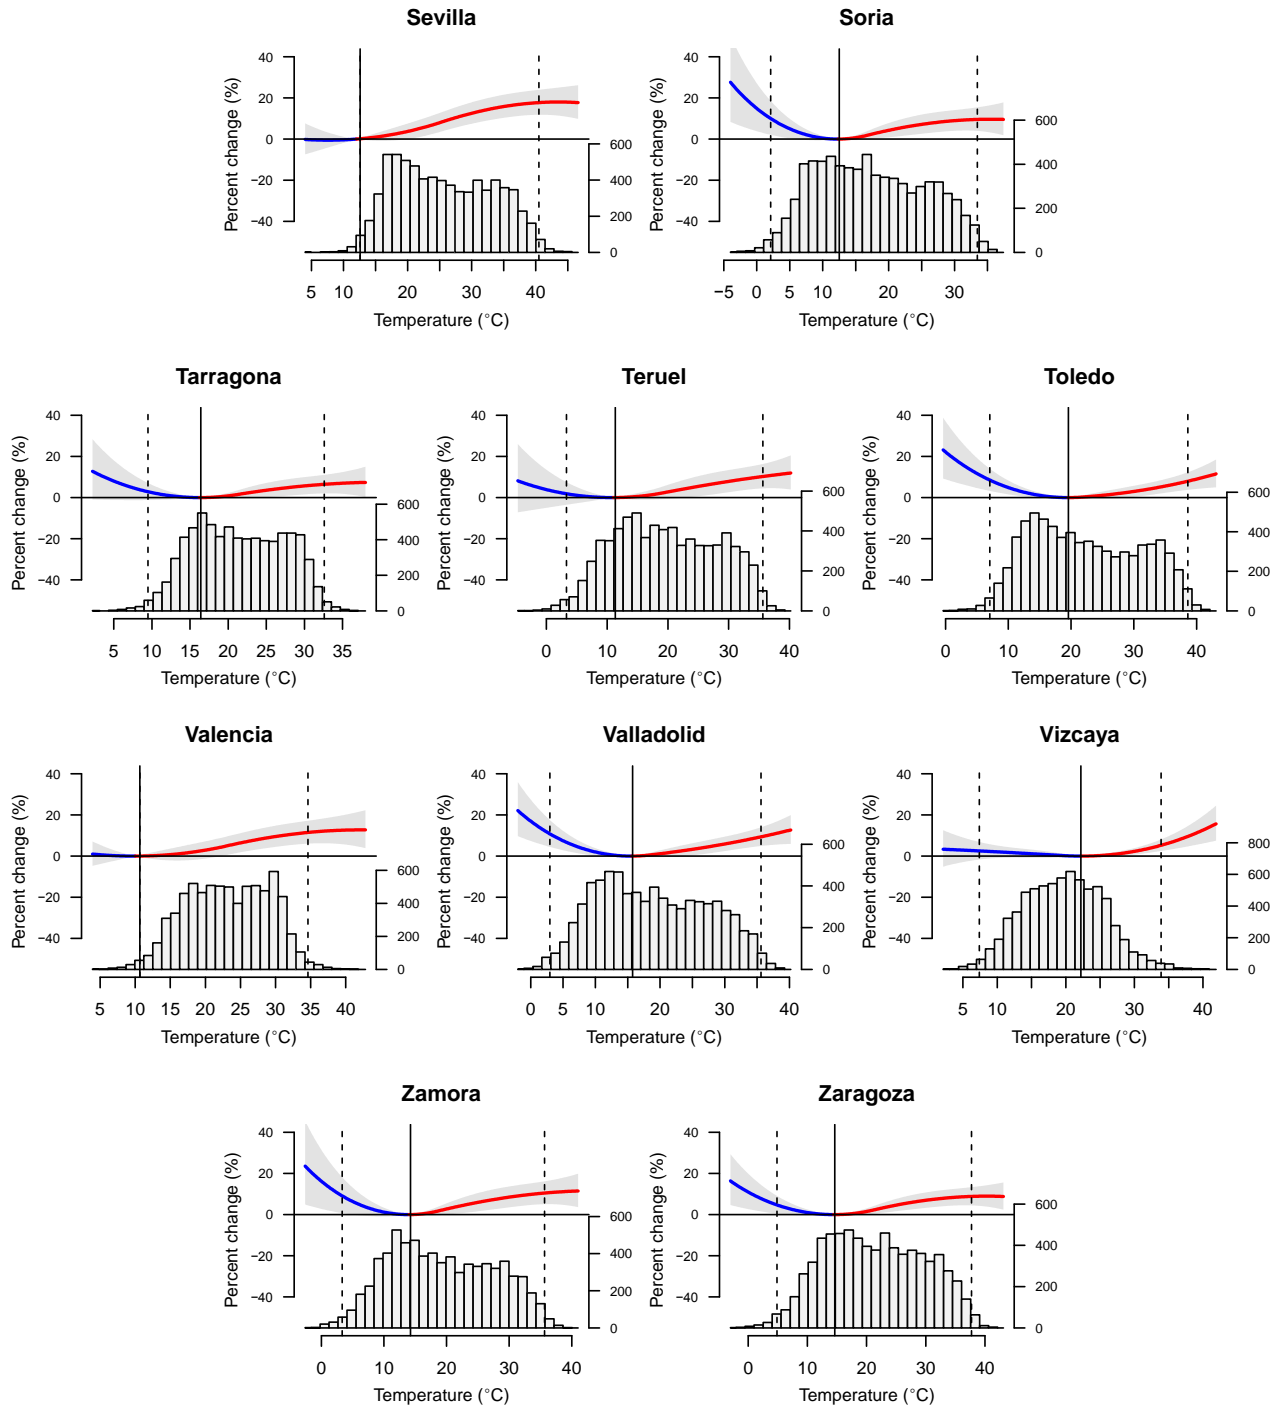

**Figure S1. Overall cumulative exposure-response relationships in 50 Spanish provinces**

These relationships were derived from the best linear unbiased prediction (BLUP) with 95%CI of the overall cumulative exposure-response association. The BLUP is a compromise between the location-specific association (1<sup>st</sup> stage) and the pooled association (2<sup>nd</sup> stage). It is used to compensate areas reporting a small daily number of occupational injuries (with imprecise estimations) with areas reporting larger numbers and similar characteristics (Post et al. 2001; Gasparrini et al. 2012).

The minimum injury temperature and the 1st and 99th percentiles are represented by solid and dashed lines, respectively.

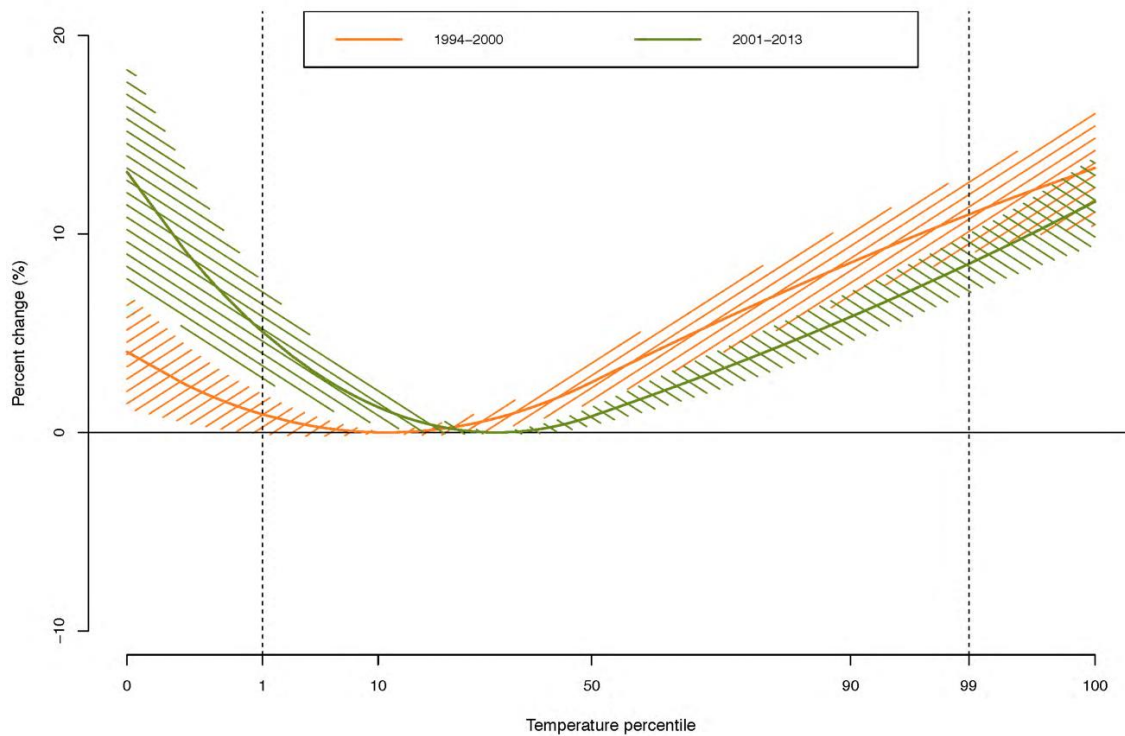

**Figure S2. Overall cumulative exposure-response relationships in Spain in two periods: 1994-2000 and 2001-2013**

Exposure-response association in percent difference (with 95% confidence interval – shaded) between ambient temperature and occupational injuries in Spain, in two periods: 1994-2000 (orange) and 2001-2013 (green). These two periods correspond to cutoff point of the implementation of occupational injury prevention programs. The relationship considers 4 days of lag. Dashed lines are temperature in the 1st and 99th percentiles.

a.

Winter temperature (°C)

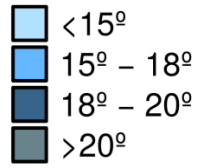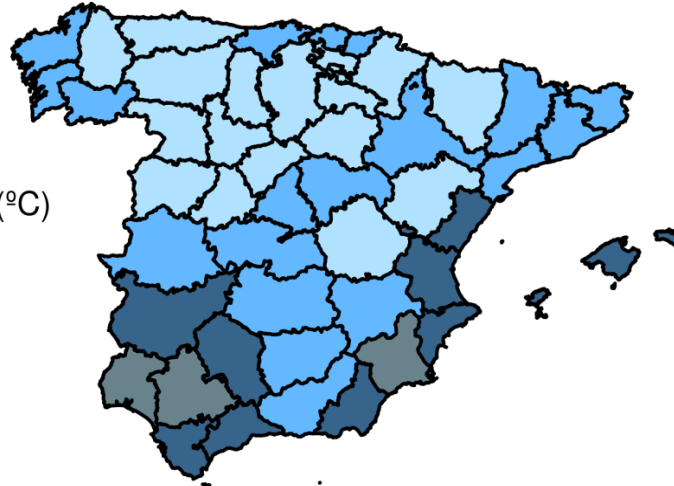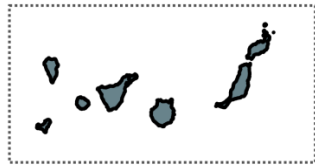

b.

Summer temperature (°C)

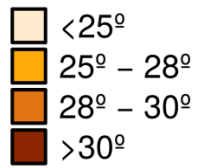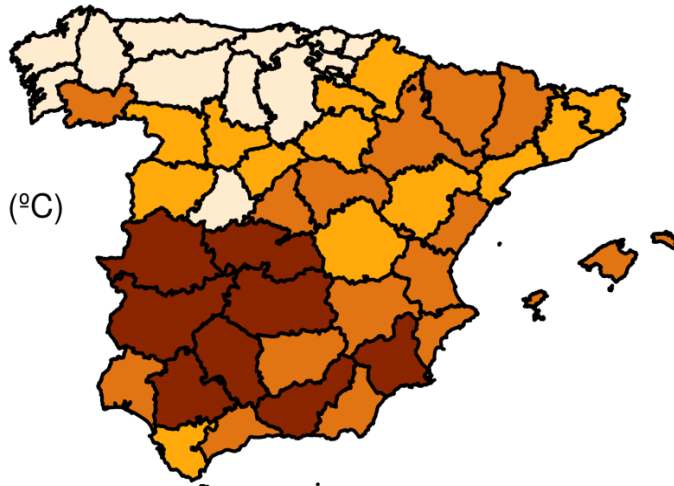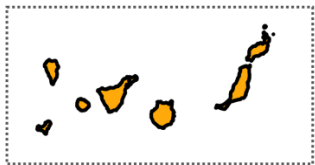

**Figure S3. Distribution of average of maximum temperatures in winter (a) and summer (b) by Spanish provinces, 1994-2013**

The winter period corresponds from the 1<sup>st</sup> of October until the 30<sup>th</sup> of April, while the summer period goes from the 1<sup>st</sup> of May until the 30<sup>th</sup> of September.



**Table S1. Descriptive statistics on daily number of occupational injuries and maximum temperature. Spanish Provinces (1994-2013)**

| Province      | Population (2001 census) | Total number of injuries | % of all injuries | Number of occupational injuries per day |     |       | Daily maximum temperature |      |      |
|---------------|--------------------------|--------------------------|-------------------|-----------------------------------------|-----|-------|---------------------------|------|------|
|               |                          |                          |                   | Mean                                    | Min | Max   | Mean                      | Min  | Max  |
| Alava         | 286,387                  | 161,933                  | 1.0               | 22.2                                    | 0   | 89    | 17.5                      | -1.5 | 40.8 |
| Albacete      | 364,835                  | 135,482                  | 0.8               | 18.5                                    | 0   | 135   | 21.1                      | -4.4 | 42.0 |
| Alicante      | 1,461,925                | 515,148                  | 3.2               | 70.5                                    | 0   | 286   | 23.5                      | 6.5  | 41.4 |
| Almeria       | 536,731                  | 223,062                  | 1.4               | 30.5                                    | 0   | 129   | 23.2                      | 8.3  | 40.6 |
| Avila         | 163,442                  | 30,954                   | 0.2               | 4.2                                     | 0   | 20    | 17.2                      | -3.7 | 37.6 |
| Badajoz       | 654,882                  | 171,110                  | 1.1               | 23.4                                    | 0   | 98    | 24.0                      | 4.0  | 44.8 |
| Illes Balears | 841,669                  | 480,101                  | 3.0               | 65.7                                    | 0   | 199   | 22.7                      | 4.8  | 41.4 |
| Barcelona     | 4,805,927                | 2,301,523                | 14.4              | 315.1                                   | 2   | 1,262 | 20.7                      | 2.7  | 37.4 |
| Burgos        | 348,934                  | 137,648                  | 0.9               | 18.8                                    | 0   | 72    | 17.0                      | -2.5 | 38.8 |
| Caceres       | 403,621                  | 94,340                   | 0.6               | 12.9                                    | 0   | 64    | 22.2                      | 3.2  | 42.6 |
| Cadiz         | 1,116,491                | 376,959                  | 2.4               | 51.6                                    | 0   | 157   | 21.9                      | 7.6  | 38.0 |
| Castellon     | 484,566                  | 208,478                  | 1.3               | 28.5                                    | 0   | 136   | 22.7                      | 6.4  | 40.6 |
| Ciudad Real   | 478,957                  | 158,359                  | 1.0               | 21.7                                    | 0   | 95    | 22.1                      | -0.2 | 43.4 |
| Cordoba       | 761,657                  | 241,416                  | 1.5               | 33.0                                    | 0   | 113   | 25.3                      | 3.8  | 46.6 |
| A Coruna      | 1,096,027                | 338,916                  | 2.1               | 46.4                                    | 0   | 207   | 18.2                      | 4.6  | 34.5 |
| Cuenca        | 200,346                  | 54,289                   | 0.3               | 7.4                                     | 0   | 50    | 19.8                      | -0.1 | 39.7 |
| Girona        | 565,304                  | 280,846                  | 1.8               | 38.4                                    | 0   | 150   | 21.5                      | 2.9  | 41.2 |
| Granada       | 821,660                  | 218,203                  | 1.4               | 29.9                                    | 0   | 127   | 23.3                      | 1.1  | 42.6 |
| Guadalajara   | 174,999                  | 80,503                   | 0.5               | 11.0                                    | 0   | 50    | 21.2                      | 0.1  | 43.5 |
| Guipuzcoa     | 673,563                  | 264,108                  | 1.7               | 36.2                                    | 0   | 149   | 19.3                      | -1.0 | 40.4 |
| Huelva        | 462,579                  | 186,828                  | 1.2               | 25.6                                    | 0   | 90    | 24.2                      | 5.0  | 43.8 |
| Huesca        | 206,502                  | 62,694                   | 0.4               | 8.6                                     | 0   | 31    | 20.1                      | -4.4 | 41.4 |
| Jaen          | 643,820                  | 175,833                  | 1.1               | 24.1                                    | 0   | 80    | 21.7                      | 1.3  | 42.8 |
| Leon          | 488,751                  | 177,392                  | 1.1               | 24.3                                    | 0   | 92    | 16.9                      | -3.0 | 36.4 |
| Lleida        | 362,206                  | 158,327                  | 1.0               | 21.7                                    | 0   | 77    | 21.8                      | -5.8 | 40.8 |
| La Rioja      | 276,702                  | 103,747                  | 0.6               | 14.2                                    | 0   | 59    | 19.9                      | -3.5 | 40.6 |
| Lugo          | 357,648                  | 82,339                   | 0.5               | 11.3                                    | 0   | 40    | 17.8                      | -1.4 | 39.1 |
| Madrid        | 5,423,384                | 2,265,782                | 14.2              | 310.2                                   | 3   | 1,196 | 21.3                      | 0.5  | 42.2 |
| Malaga        | 1,287,017                | 491,705                  | 3.1               | 67.3                                    | 0   | 230   | 23.5                      | 6.8  | 44.0 |
| Murcia        | 1,197,646                | 504,135                  | 3.2               | 69.0                                    | 0   | 310   | 25.1                      | 5.5  | 45.7 |
| Navarra       | 555,829                  | 239,352                  | 1.5               | 32.8                                    | 0   | 142   | 18.2                      | -2.1 | 40.6 |
| Ourense       | 338,446                  | 75,517                   | 0.5               | 10.3                                    | 0   | 50    | 21.8                      | 2.4  | 42.2 |
| Asturias      | 1,062,998                | 404,968                  | 2.5               | 55.4                                    | 0   | 305   | 17.2                      | 3.7  | 36.0 |
| Palencia      | 174,143                  | 52,722                   | 0.3               | 7.2                                     | 0   | 34    | 17.0                      | -2.5 | 38.8 |
| Las Palmas    | 887,676                  | 416,609                  | 2.6               | 57.0                                    | 1   | 215   | 24.4                      | 15.8 | 39.0 |
| Pontevedra    | 903,759                  | 341,550                  | 2.1               | 46.8                                    | 0   | 170   | 19.2                      | 4.5  | 39.5 |
| Salamanca     | 345,609                  | 81,057                   | 0.5               | 11.1                                    | 0   | 43    | 19.5                      | -3.0 | 39.8 |

| Province               | Population<br>(2001 census) | Total number of<br>injuries | % of all<br>injuries | Number of occupational<br>injuries per day |           |              | Daily maximum<br>temperature |            |             |
|------------------------|-----------------------------|-----------------------------|----------------------|--------------------------------------------|-----------|--------------|------------------------------|------------|-------------|
|                        |                             |                             |                      | Mean                                       | Min       | Max          | Mean                         | Min        | Max         |
| Santa Cruz de Tenerife | 806,801                     | 328,268                     | 2.1                  | 44.9                                       | 0         | 179          | 24.9                         | 15.4       | 42.9        |
| Cantabria              | 535,131                     | 176,444                     | 1.1                  | 24.2                                       | 0         | 83           | 18.8                         | 4.0        | 37.8        |
| Segovia                | 147,694                     | 43,966                      | 0.3                  | 6.0                                        | 0         | 37           | 18.1                         | -2.6       | 38.6        |
| Sevilla                | 1,727,603                   | 614,930                     | 3.8                  | 84.2                                       | 0         | 269          | 25.7                         | 4.0        | 46.6        |
| Soria                  | 90,717                      | 30,397                      | 0.2                  | 4.2                                        | 0         | 34           | 17.5                         | -4.0       | 37.4        |
| Tarragona              | 609,673                     | 266,332                     | 1.7                  | 36.5                                       | 0         | 163          | 21.5                         | 2.2        | 38.0        |
| Teruel                 | 135,858                     | 40,725                      | 0.3                  | 5.6                                        | 0         | 27           | 19.8                         | -4.8       | 40.2        |
| Toledo                 | 541,379                     | 233,472                     | 1.5                  | 32.0                                       | 0         | 126          | 22.5                         | -0.4       | 43.1        |
| Valencia               | 2,216,285                   | 1,017,410                   | 6.4                  | 139.3                                      | 1         | 657          | 23.2                         | 3.9        | 42.8        |
| Valladolid             | 498,094                     | 152,836                     | 1.0                  | 20.9                                       | 0         | 75           | 18.9                         | -2.0       | 40.2        |
| Vizcaya                | 1,122,637                   | 450,183                     | 2.8                  | 61.6                                       | 0         | 235          | 19.5                         | 2.1        | 41.9        |
| Zamora                 | 199,090                     | 39,552                      | 0.2                  | 5.4                                        | 0         | 24           | 19.3                         | -2.6       | 41.0        |
| Zaragoza               | 861,855                     | 303,860                     | 1.9                  | 41.6                                       | 0         | 169          | 21.5                         | -3.0       | 43.1        |
| <b>TOTAL</b>           | <b>40,709,455</b>           | <b>15,992,310</b>           | -                    | <b>2,189</b>                               | <b>17</b> | <b>8,018</b> | <b>20.9</b>                  | <b>4.4</b> | <b>37.0</b> |

**Table S2. Daily variation in maximum temperature within four Spanish provinces**

Data from January 1983 to December 2006 in four Spanish provinces. The capital of each province was also included in the list of stations.

---

| Province  | Number of stations | Maximum temperature correlation |      | Minimum temperature correlation |      |
|-----------|--------------------|---------------------------------|------|---------------------------------|------|
|           |                    | Range                           | Mean | Range                           | Mean |
| Barcelona | 21                 | [0.89 - 1.00]                   | 0.95 | [0.86 - 1.00]                   | 0.95 |
| Girona    | 16                 | [0.87 - 1.00]                   | 0.95 | [0.82 - 1.00]                   | 0.93 |
| Lleida    | 15                 | [0.86 - 1.00]                   | 0.94 | [0.83 - 1.00]                   | 0.94 |
| Tarragona | 14                 | [0.89 - 1.00]                   | 0.95 | [0.87 - 1.00]                   | 0.95 |

---

**Table S3. Sensitivity analyses**

Computed on the percent difference (%), the percentile of minimum occupational injuries, and the fraction (%) attributable to temperature (total, cold, and heat components), by varying modelling choices, fitting the models to all occupational injuries.

| Modelling choices                                            | COLD EFFECTS    | PMOI | HOT EFFECTS      | ATTRIBUTABLE FRACTION |                  |                  |
|--------------------------------------------------------------|-----------------|------|------------------|-----------------------|------------------|------------------|
|                                                              | 1st vs PMOI (%) |      | 99th vs PMOI (%) | Total (%)             | Cold (%)         | Heat (%)         |
| Main model                                                   | 4 (2-6)         | 27   | 9 (8-11)         | 2.72 (2.44-2.97)      | 0.32 (0.24-0.38) | 2.40 (2.09-2.68) |
| Knots for exposure-response: 33rd and 66th percentiles       | 4 (2-6)         | 25   | 9 (7-11)         | 2.93 (2.62-3.22)      | 0.36 (0.27-0.44) | 2.57 (2.23-2.89) |
| Knots for exposure-response: 25th and 75th percentiles       | 4 (2-6)         | 20   | 9 (7-11)         | 2.91 (2.54-3.23)      | 0.32 (0.24-0.39) | 2.59 (2.20-2.94) |
| Knots for exposure-response: 25th, 50th and 75th percentiles | 4 (2-6)         | 22   | 9 (7-11)         | 3.18 (2.85-3.47)      | 0.43 (0.34-0.51) | 2.75 (2.40-3.07) |
| Lag period: 5                                                | 4 (2-6)         | 29   | 9 (8-11)         | 2.94 (2.60-3.26)      | 0.33 (0.24-0.42) | 2.61 (2.24-2.95) |
| Lag period: 7                                                | 4 (2-7)         | 32   | 8 (7-10)         | 3.01 (2.36-3.54)      | 0.56 (0.38-0.72) | 2.44 (1.84-2.97) |
| Df/year for seasonal control: 6                              | 4 (2-6)         | 28   | 8 (6-9)          | 2.69 (2.40-2.95)      | 0.42 (0.33-0.50) | 2.28 (1.98-2.54) |
| Df/year for seasonal control: 10                             | 5 (3-7)         | 29   | 8 (7-9)          | 2.66 (2.44-2.86)      | 0.37 (0.29-0.43) | 2.29 (2.04-2.53) |
| <b>Exposure</b>                                              |                 |      |                  |                       |                  |                  |
| Mean temperature                                             | 6 (4-8)         | 35   | 9 (8-10)         | 2.31 (2.18-2.42)      | 0.52 (0.46-0.59) | 1.78 (1.63-1.91) |
| Minimum temperature                                          | 8 (6-10)        | 50   | 5 (4-6)          | 1.86 (1.72-1.98)      | 0.78 (0.71-0.83) | 1.08 (0.97-1.18) |

PMOI: percentile of minimum occupational injuries

**Table S4. Percent difference (95% Confidence Intervals) for the relationship between extreme cold - hot ambient temperatures and occupational injuries in Spain (1994-2013)**

| Workers' characteristics          | Total number of injuries | % of all injuries | COLD EFFECTS    | PMOI | HOT EFFECTS      | p-value <sup>b</sup> |
|-----------------------------------|--------------------------|-------------------|-----------------|------|------------------|----------------------|
|                                   |                          |                   | 1st vs PMOI (%) |      | 99th vs PMOI (%) |                      |
| <b>Overall</b>                    | <b>15,992,310</b>        | -                 | 4 (2-6)*        | 27   | 9 (8-11)*        | -                    |
| <b>Sex</b>                        |                          |                   |                 |      |                  |                      |
| Women                             | 3,568,753                | 22.32             | 11 (8-5)*       | 42   | 5 (2-7)*         | <0.000               |
| Men                               | 12,423,557               | 77.68             | 3 (1-5)*        | 23   | 9 (7-12)*        |                      |
| <b>Age group</b>                  |                          |                   |                 |      |                  |                      |
| ≤24                               | 2,894,904                | 18.10             | 0 (-1-2)        | 10   | 11 (8-14)*       | <0.000               |
| 25-34                             | 5,092,208                | 31.84             | 3 (1-5)*        | 26   | 7 (5-10)*        |                      |
| 35-54                             | 6,773,912                | 42.36             | 6 (4-8)*        | 30   | 8 (5-10)*        |                      |
| ≥55                               | 1,231,286                | 7.70              | 2 (9-15)*       | 36   | 6 (3-10)*        |                      |
| <b>Nationality<sup>a</sup></b>    |                          |                   |                 |      |                  |                      |
| Spanish                           | 7,593,356                | 88.01             | 7 (4-10)*       | 34   | 7 (4-10)*        | 0.144                |
| Other                             | 869,802                  | 10.08             | 2 (-1-5)        | 17   | 9 (4-14)*        |                      |
| Unknown                           | 164,503                  | 1.91              |                 |      |                  |                      |
| <b>Type of contract</b>           |                          |                   |                 |      |                  |                      |
| Permanent                         | 7,640,135                | 47.77             | 7 (5-9)*        | 34   | 7 (5-9)*         | 0.022                |
| Temporary                         | 7,890,694                | 49.34             | 3 (1-5)*        | 22   | 9 (7-12)*        |                      |
| Other <sup>(1)</sup>              | 296,106                  | 1.85              | 3 (1-5)*        | 27   | 6 (3-8)*         |                      |
| <b>Selected economic sectors</b>  |                          |                   |                 |      |                  |                      |
| Agriculture, forestry and fishing | 741,292                  | 4.64              | -5 (-8- -2)     | 10   | 29 (23-36)*      | <0.000               |
| Construction                      | 3,546,754                | 22.18             | 2 (0-4)         | 20   | 9 (6-12)*        |                      |

| Workers' characteristics                                           | Total number of injuries | % of all injuries | COLD EFFECTS    | PMOI | HOT EFFECTS      | p-value <sup>b</sup> |
|--------------------------------------------------------------------|--------------------------|-------------------|-----------------|------|------------------|----------------------|
|                                                                    |                          |                   | 1st vs PMOI (%) |      | 99th vs PMOI (%) |                      |
| Electricity, gas, steam and air conditioning supply <sup>(2)</sup> | 37,012                   | 0.23              | 10 (-4-25)      | 88   | 1 (-6-10)*       |                      |
| Extractive industries <sup>(3)</sup>                               | 218,184                  | 1.36              | 1 (-4-5)        | 10   | 13 (5-21)*       |                      |
| Waste collection, treatment and removal <sup>(4)</sup>             | 151,374                  | 0.95              | 1 (-3-6)        | 17   | 12 (4-20)*       |                      |
| Transport and storage                                              | 941,369                  | 5.89              | 11 (8-14)*      | 38   | 8 (4-11)*        |                      |
| Hotel industry                                                     | 976,342                  | 6.11              | 5 (2-7)*        | 35   | 10 (7-13)*       |                      |
| Manufacturing                                                      | 4,023,643                | 25.16             | 5 (3-8)*        | 36   | 4 (2-7)*         |                      |
| <b>Type on injury</b>                                              |                          |                   |                 |      |                  |                      |
| Superficial injuries                                               | 4,473,748                | 27.97             | 4 (2-5)*        | 22   | 12 (10-15)*      |                      |
| Bone fractures, strains and sprains                                | 10,062,448               | 62.92             | 4 (2-7)*        | 31   | 5 (3-7)*         |                      |
| Internal injuries and contusions                                   | 529,667                  | 3.31              | 5 (1-9)*        | 32   | 3 (-2-7)         |                      |
| Burns and frostbite                                                | 256,052                  | 1.60              | 6 (2-10)*       | 17   | 61 (51-71)*      |                      |
| Choking and asphyxia <sup>(5)</sup>                                | 12,186                   | 0.08              | -3 (-19-16)     | 10   | 21 (-24-92)      |                      |
| Effects of extreme temperatures <sup>(6)</sup>                     | 15,580                   | 0.10              | -5 (-22-16)     | 10   | 81 (22-169)*     |                      |
| Psychological damages and traumatic events <sup>(7)</sup>          | 18,997                   | 0.12              | -1 (-21-23)     | 90   | -11 (-23-5)      | <0.000               |
| Multiple injuries                                                  | 235,835                  | 1.47              | 17 (12-23)*     | 38   | 16 (8-24)*       |                      |
| Heart attack, stroke and non traumatic pathologies <sup>(8)</sup>  | 27,655                   | 0.17              | 1 (-8-10)       | 10   | 11 (-7-33)       |                      |
| Other injuries <sup>(9)</sup>                                      | 360,142                  | 2.25              | -3 (-21-18)     | 10   | 23 (-26-3)       |                      |
| <b>Duration of leave (days)</b>                                    |                          |                   |                 |      |                  |                      |
| <4                                                                 | 1,766,077                | 11.04             | 8 (5-11)*       | 46   | 3 (0-6)          | <0.000               |

| Workers' characteristics           | Total number of injuries | % of all injuries | COLD EFFECTS    | PMOI | HOT EFFECTS      | p-value <sup>b</sup> |
|------------------------------------|--------------------------|-------------------|-----------------|------|------------------|----------------------|
|                                    |                          |                   | 1st vs PMOI (%) |      | 99th vs PMOI (%) |                      |
| 4-15                               | 7,388,886                | 46.20             | 4 (2-6)*        | 29   | 8 (5-10)*        |                      |
| 16-60                              | 5,706,709                | 35.68             | 4 (1-6)*        | 22   | 10 (8-13)*       |                      |
| >60                                | 1,130,638                | 7.07              | 9 (6-13)*       | 33   | 9 (6-12)*        |                      |
| <b>Workers' occupational class</b> |                          |                   |                 |      |                  |                      |
| Non-manual workers                 | 1,506,913                | 9.42              | 18 (13-22)*     | 39   | 9 (5-12)*        | <0.000               |
| Manual workers                     | 13,072,003               | 81.74             | 3 (1-5)*        | 27   | 6 (3-8)*         |                      |

PMOI: percentile of minimum occupational injuries

<sup>a</sup> Data available since 2003

<sup>b</sup> Results from a multivariate Wald-test

Some provinces were excluded from the model due to convergence problems. <sup>(1)</sup> 22 provinces; <sup>(2)</sup> 7 provinces; <sup>(3)</sup> 3 provinces; <sup>(4)</sup> 5 provinces; <sup>(5)</sup> 36 provinces; <sup>(6)</sup> 26 provinces; <sup>(7)</sup> 8 provinces; <sup>(8)</sup> 11 provinces; <sup>(9)</sup> 8 provinces

\* p-value<0.05

**Table S5. Percent difference (95% Confidence Intervals) for the relationship between extreme cold - hot ambient temperatures and occupational injuries in Spain (1994-2013). Economic sectors and sex / age**

| Workers' characteristics                            |       | Total number of work-injuries | % of all injuries | % of injuries in the economic sector | COLD EFFECTS    | PMOI | HOT EFFECTS      |
|-----------------------------------------------------|-------|-------------------------------|-------------------|--------------------------------------|-----------------|------|------------------|
|                                                     |       |                               |                   |                                      | 1st vs PMOI (%) |      | 99th vs PMOI (%) |
| <b>Selected economic sectors and sex</b>            |       |                               |                   |                                      |                 |      |                  |
| Agriculture, forestry and fishing                   |       |                               |                   |                                      |                 |      |                  |
|                                                     | Women | 143,589                       | 0.9               | 19.37                                | 0 (-6 - 7)      | 10   | 30 (20 - 42)     |
|                                                     | Men   | 597,703                       | 3.74              | 80.63                                | -7 (-10--4)     | 10   | 30 (25 - 36)     |
| Construction                                        |       |                               |                   |                                      |                 |      |                  |
|                                                     | Women | 66,062                        | 0.41              | 1.86                                 | -               | -    | -                |
|                                                     | Men   | 3,480,692                     | 21.76             | 98.14                                | -               | -    | -                |
| Electricity, gas, steam and air conditioning supply |       |                               |                   |                                      |                 |      |                  |
|                                                     | Women | 2,254                         | 0.01              | 6.09                                 | -               | -    | -                |
|                                                     | Men   | 34,758                        | 0.22              | 93.91                                | -               | -    | -                |
| Extractive industries                               |       |                               |                   |                                      |                 |      |                  |
|                                                     | Women | 5,679                         | 0.04              | 2.60                                 | -               | -    | -                |
|                                                     | Men   | 212,505                       | 1.33              | 97.40                                | -               | -    | -                |
| Waste collection, treatment and removal             |       |                               |                   |                                      |                 |      |                  |
|                                                     | Women | 22,723                        | 0.14              | 15.01                                | -               | -    | -                |
|                                                     | Men   | 128,651                       | 0.8               | 84.99                                | -               | -    | -                |
| Transport and storage                               |       |                               |                   |                                      |                 |      |                  |
|                                                     | Women | 125,580                       | 0.79              | 13.34                                | -               | -    | -                |
|                                                     | Men   | 815,789                       | 5.1               | 86.66                                | -               | -    | -                |
| Hotel industry                                      |       |                               |                   |                                      |                 |      |                  |
|                                                     | Women | 479,811                       | 3                 | 49.14                                | 5 (1 - 9)       | 52   | 8 (4 - 11)       |
|                                                     | Men   | 496,531                       | 3.1               | 50.86                                | 4 (1 - 8)       | 58   | 12 (8 - 16)      |
| Manufacturing                                       |       |                               |                   |                                      |                 |      |                  |
|                                                     | Women | 538,167                       | 3.37              | 13.38                                | -               | -    | -                |



| Workers' characteristics                            |                    | Total number of work-injuries | % of all injuries | % of injuries in the economic sector | COLD EFFECTS    | PMOI | HOT EFFECTS      |
|-----------------------------------------------------|--------------------|-------------------------------|-------------------|--------------------------------------|-----------------|------|------------------|
|                                                     |                    |                               |                   |                                      | 1st vs PMOI (%) |      | 99th vs PMOI (%) |
|                                                     | Men                | 3,485,476                     | 21.79             | 86.62                                | -               | -    | -                |
| <b>Selected economic sectors and age group</b>      |                    |                               |                   |                                      |                 |      |                  |
| Agriculture, forestry and fishing                   | ≤24 <sup>(1)</sup> | 125,439                       | 0.78              | 16.92                                | -9 (-16 - -3)   | 10   | 34 (21 - 47)     |
|                                                     | 25-34              | 204,839                       | 1.28              | 27.63                                | -7 (-11 - -3)   | 10   | 29 (20 - 38)     |
|                                                     | 35-54              | 333,222                       | 2.08              | 44.95                                | -6 (-9 - -3)    | 10   | 31 (24 - 38)     |
|                                                     | ≥55                | 77,792                        | 0.49              | 10.49                                | -3 (-9 - 3)     | 10   | 35 (23 - 48)     |
| Construction                                        | ≤24                | 703,393                       | 4.4               | 19.83                                | -1 (-3 - 1)     | 10   | 14 (10 - 18)     |
|                                                     | 25-34              | 1,191,964                     | 7.45              | 33.61                                | 0 (-1 - 2)      | 10   | 10 (7 - 13)      |
|                                                     | 35-54              | 1,416,791                     | 8.86              | 39.95                                | 2 (0 - 4)       | 19   | 9 (7 - 12)       |
|                                                     | ≥55                | 234,606                       | 1.47              | 6.61                                 | 7 (2 - 12)      | 35   | 7 (2 - 12)       |
| Electricity, gas, steam and air conditioning supply | ≤24                | 4,469                         | 0.03              | 12.07                                | -               | -    | -                |
|                                                     | 25-34              | 10,021                        | 0.06              | 27.08                                | -               | -    | -                |
|                                                     | 35-54              | 18,879                        | 0.12              | 51.01                                | -               | -    | -                |
|                                                     | ≥55                | 3,643                         | 0.02              | 9.84                                 | -               | -    | -                |
| Extractive industries                               | ≤24                | 15,348                        | 0.1               | 7.03                                 | -               | -    | -                |
|                                                     | 25-34              | 64,549                        | 0.4               | 29.58                                | -               | -    | -                |
|                                                     | 35-54              | 131,600                       | 0.82              | 60.32                                | -               | -    | -                |
|                                                     | ≥55                | 6,687                         | 0.04              | 3.06                                 | -               | -    | -                |
| Waste collection, treatment and removal             | ≤24                | 13,190                        | 0.08              | 8.71                                 | -               | -    | -                |
|                                                     | 25-34              | 41,986                        | 0.26              | 27.74                                | -               | -    | -                |

| Workers' characteristics |                    | Total number of work-injuries | % of all injuries | % of injuries in the economic sector | COLD EFFECTS    | PMOI | HOT EFFECTS      |
|--------------------------|--------------------|-------------------------------|-------------------|--------------------------------------|-----------------|------|------------------|
|                          |                    |                               |                   |                                      | 1st vs PMOI (%) |      | 99th vs PMOI (%) |
|                          | 35-54              | 81,416                        | 0.51              | 53.78                                | -               | -    | -                |
|                          | ≥55                | 14,782                        | 0.09              | 9.77                                 | -               | -    | -                |
| Transport and storage    | ≤24 <sup>(2)</sup> | 104,483                       | 0.65              | 11.10                                | 3 (-2 - 9)      | 18   | 22 (13 - 32)     |
|                          | 25-34              | 305,261                       | 1.91              | 32.43                                | 5 (2 - 9)       | 43   | 5 (0 - 11)       |
|                          | 35-54              | 459,276                       | 2.87              | 48.79                                | 12 (9 - 16)     | 40   | 8 (5 - 12)       |
|                          | ≥55 <sup>(3)</sup> | 72,349                        | 0.45              | 7.69                                 | 16 (8 - 25)     | 37   | 8 (-5 - 23)      |
| Hotel industry           | ≤24                | 228,012                       | 1.43              | 23.35                                | 2 (-3 - 6)      | 26   | 15 (10 - 21)     |
|                          | 25-34              | 307,995                       | 1.93              | 31.55                                | 7 (3 - 10)      | 29   | 10 (5 - 15)      |
|                          | 35-54              | 380,377                       | 2.38              | 38.96                                | 2 (-1 - 6)      | 54   | 8 (4 - 12)       |
|                          | ≥55 <sup>(4)</sup> | 59,958                        | 0.37              | 6.14                                 | 11 (3 - 21)     | 49   | 2 (-8 - 13)      |
| Manufacturing            | ≤24                | 768,375                       | 4.8               | 19.10                                | 1 (-2 - 3)      | 18   | 8 (4 - 12)       |
|                          | 25-34              | 1,282,353                     | 8.02              | 31.87                                | 4 (1 - 6)       | 37   | 5 (2 - 8)        |
|                          | 35-54              | 1,658,602                     | 10.37             | 41.22                                | 6 (4 - 8)       | 36   | 6 (3 - 8)        |
|                          | ≥55                | 314,313                       | 1.97              | 7.81                                 | 11 (8 - 15)     | 40   | 6 (1 - 12)       |

PMOI: percentile of minimum occupational injuries

Those economic sectors with more than 85% of injuries registered among male workers have been excluded from the analyses due to the failure to check sex differences.

Some provinces were excluded from the model due to convergence problems. <sup>(1)</sup> 1 province; <sup>(2)</sup> 6 provinces; <sup>(3)</sup> 2 provinces; <sup>(4)</sup> 8 provinces

**Table S6. Percent difference (95% Confidence Intervals) for the relationship between extreme cold - hot ambient temperatures and occupational injuries in Spain in two periods: 1994-2000 and 2001-2013.**

| <b>Period</b>            | <b>COLD EFFECTS<br/>1st vs PMOI (%)</b> | <b>PMOI</b> | <b>HOT EFFECTS<br/>99th vs PMOI (%)</b> |
|--------------------------|-----------------------------------------|-------------|-----------------------------------------|
| Total period (1994-2013) | 4 (2-6)                                 | 27          | 9 (8-11)                                |
| Period 1994-2000         | 1 (0-2)                                 | 11          | 11 (9-13)                               |
| Period 2001-2013         | 5 (3-8)                                 | 33          | 8 (7-10)                                |

These two periods correspond to cutoff point of the implementation of occupational injury prevention programs.

#### **References**

- Gasparrini A, Armstrong B, Kenward MG. 2012. Multivariate Meta-Analysis for Non-Linear and Other Multi-Parameter Associations. *Stat Med* 31 (29): 3821. doi:10.1002/sim.5471.
- Post E, Hoaglin D, Deck L, Larntz K. 2001. An Empirical Bayes Approach to Estimating the Relation of Mortality to Exposure to Particulate Matter. *Risk Anal Off Publ Soc Risk Anal* 21 (5): 837–42.
